# Supplementary material for: Facile and cost-effective NiO/MgO–SiO 2 composites for efficient oxygen evolution reaction and asymmetric supercapacitor systems
Source: Royal Society of Chemistry journal article supplement (doi:10.1039/d5ra00671f), 2025-01-01
Supplement: d5ra00671f1.pdf [file d5ra00671f1.pdf]

## Supporting information

### Facile and cost effective NiO/MgO-SiO<sub>2</sub> composites for efficient oxygen evolution reaction and asymmetric supercapacitor systems

Gulzar Ali<sup>1</sup>, Aneela Tahira<sup>2</sup>, Asma Hayat<sup>1</sup>, Mukhtiar Ali Bozdar<sup>8</sup>, Muhammad Ali Bhatti<sup>3</sup>, Elmuez Dawi<sup>4</sup>, Ayman Nafady<sup>5</sup>, Matteo Tonezzer<sup>6</sup>, Ghulam Mustafa Thebo<sup>7</sup>, Muhammad Kashif Samoon<sup>7</sup>, Zafar Hussain Ibupoto\*<sup>1</sup>

<sup>1</sup>*Institute of Chemistry, University of Sindh, Jamshoro 76080, Pakistan.  
[gulzaralichemist@gmail.com](mailto:gulzaralichemist@gmail.com) ; [asmabaloch141617@gmail.com](mailto:asmabaloch141617@gmail.com) ; [zaffar.ibhupoto@usindh.edu.pk](mailto:zaffar.ibhupoto@usindh.edu.pk)*

<sup>2</sup>*Institute of Chemistry, Shah Abdul Latif University Khairpur Mirs, Sindh, Pakistan.  
[aneela.tahira@salu.edu.pk](mailto:aneela.tahira@salu.edu.pk)*

<sup>3</sup>*Centre for Environmental Sciences, University of Sindh Jamshoro, 76080, Sindh, Pakistan.  
[mali.bhatti@usindh.edu.pk](mailto:mali.bhatti@usindh.edu.pk)*

<sup>4</sup>*College of Humanities and Sciences, Department of Mathematics and Sciences, Ajman University, P.O. Box 346, Ajman, UAE. [e.dawi@ajman.ac.ae](mailto:e.dawi@ajman.ac.ae)*

<sup>5</sup>*Chemistry Department, College of Science, King Saud University, Riyadh, 11451, Saudi Arabia.  
[anafady@ksu.edu.sa](mailto:anafady@ksu.edu.sa) ; [ralshammari@ksu.edu.sa](mailto:ralshammari@ksu.edu.sa)*

<sup>6</sup>*Department of Chemical and Geological Sciences, University of Cagliari, Monserrato, Italy.  
[matteo.tonezzer@cnr.it](mailto:matteo.tonezzer@cnr.it)*

<sup>7</sup>*Centre for Pure and Applied Geology, University of Sindh Jamshoro, Jamshoro, Sindh, 76080, Pakistan.  
[kashif.samoon@usindh.edu.pk](mailto:kashif.samoon@usindh.edu.pk)*

<sup>8</sup>*Department of Energy and Environment, Sindh Agriculture University Tando Jam, Sindh, Pakistan.*

*\*Corresponding author(s):  
Zafar Hussain Ibupoto, PhD, Email: [zaffar.ibhupoto@usindh.edu.pk](mailto:zaffar.ibhupoto@usindh.edu.pk)*

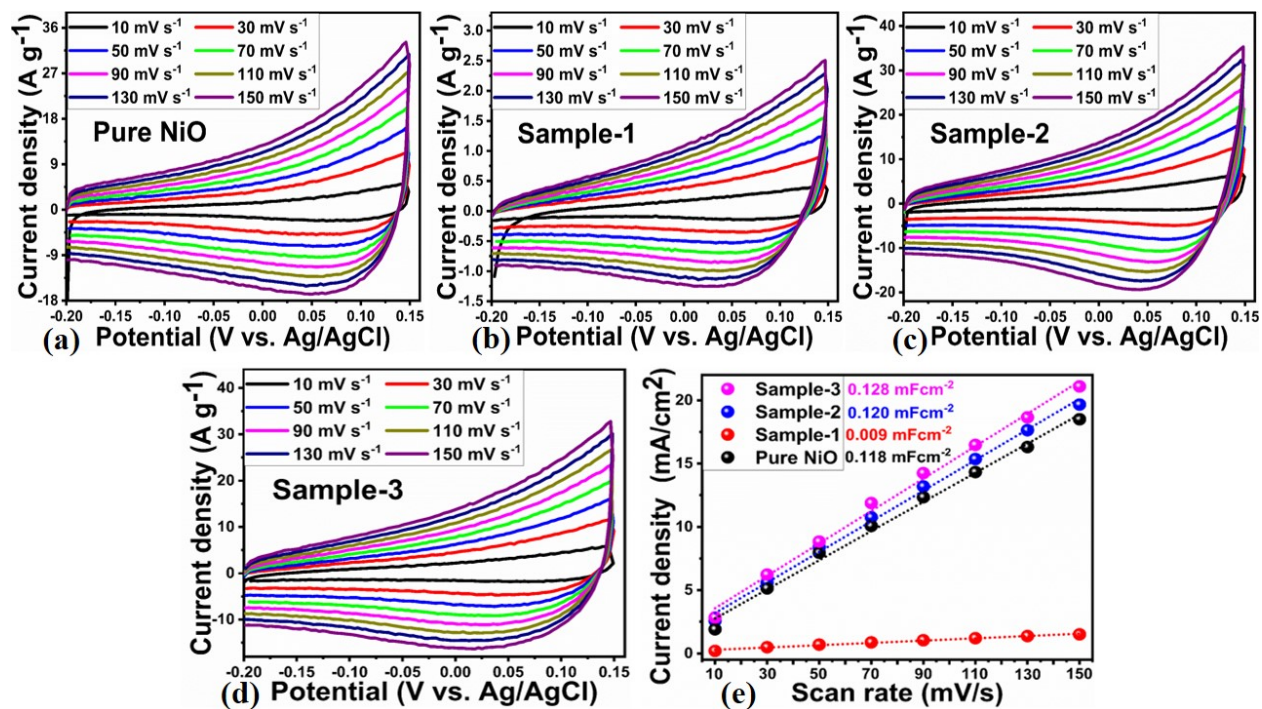

**Figure (S1):** Non Faradic CV curves in 1M KOH aqueous solution using different scan rates (a) pure NiO, (b) MgO-SiO<sub>2</sub> composites (sample1), (c,d) NiO/MgO-SiO<sub>2</sub> composites (sample 2 and sample 3) using different scan rates in electrolytic solution of 3M KOH for the illustration of capacitance performance of each electrode material, (f) Corresponding ECSA analysis.

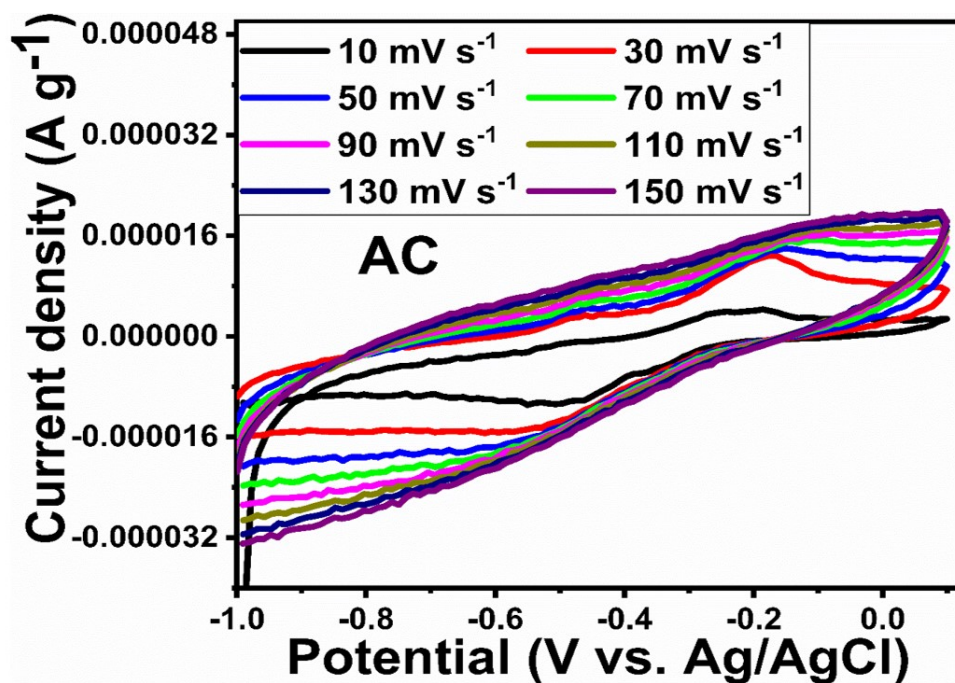

**Figure (S2):** Various CV curves of AC in 3M KOH electrolyte with increasing sweeping rate.

**Table (S1).** OER comparative study of NiO/MgO-SiO<sub>2</sub> composite (sample 3).

| <b>Catalyst</b>                                                    | <b><math>\eta</math> for OER<br/>(mV@mA cm<sup>-2</sup>)</b> | <b>Electrolyte</b> | <b>References</b> |
|--------------------------------------------------------------------|--------------------------------------------------------------|--------------------|-------------------|
| CuCo <sub>2</sub> S <sub>4</sub> /NiCo <sub>2</sub> S <sub>4</sub> | 271 @ 10                                                     | 1.0 M KOH          | [1]               |
| Mo-Ni-Se@NF                                                        | 397@ 100                                                     |                    | [2]               |
| NiCoFe-S/Ti                                                        | 230@ 10                                                      | 1.0 M KOH          | [3]               |
| NiFe/(Ni,Fe) <sub>3</sub> S <sub>2</sub>                           | 224@10<br>303@400                                            | 1.0 M KOH          | [4]               |
| NiCoP/NF                                                           | 280@10                                                       | 1.0 M KOH          | [5]               |

|                                                        |            |                  |                  |
|--------------------------------------------------------|------------|------------------|------------------|
| Co <sub>3</sub> O <sub>4</sub> @CoMoO <sub>4</sub> /NF | 318@20     | 1.0 M KOH        | [6]              |
| Co <sub>3</sub> O <sub>4</sub> /MgO–SiO <sub>2</sub>   | 340 @10    | 1.0 M KOH        | [7]              |
| Co <sub>3</sub> O <sub>4</sub> –MgO                    | 247@10     | 1.0 M KOH        | [8]              |
| MgO/Co <sub>3</sub> O <sub>4</sub> (C-2)               | 270@10     | 1.0 M KOH        | [9]              |
| ZnO-Cr-Mg:5%                                           | 345 @10    | 1.0 M KOH        | [10]             |
| <b>Sample-3</b>                                        | <b>230</b> | <b>1.0 M KOH</b> | <b>This Work</b> |

- [1] L. Ma, J. Liang, T. Chen, Y. Liu, S. Li and G. Fang, *Electrochim Acta*. 2019, **326**, 135002.
- [2] H. Yang, Y. Huang, W.Y. Teoh, L. Jiang, W. Chen, L. Zhang and J. Yan, *Electrochim Acta*. 2020, **349**, 136336.
- [3] D. Li, Z. Liu, J. Wang, B. Liu, Y. Qin, W. Yang and J. Liu, *Electrochim Acta*. 2020, **340**, 135957.
- [4] C.T. Hsieh, X.F. Chuah, C.L. Huang, H.W. Lin, Y.A. Chen and S.Y. Lu, *Small Methods*. 2019, **3**, 1900234
- [5] H. Liang, A.N. Gandi, A.H. Anjum, X. Wang, U. Schwingenschlögl and H.N. Alshareef, *Nano Lett*. 2016, **16**, 7718-25.
- [6] L. Zhang, T. Mi, M.A. Ziaee, L. Liang and R. Wang, *J Mater Chem A*. 2018, **6**, 1639-47.
- [7]. G. Ali, A. Tahira, A. Hayat, M.A. Bhatti, A.A. Shah, S.N.U.S. Bukhari, E. Dawi, A. Nafady, R.H. Alshammari, M. Tonezzer, M.K. Samoon, Z.H. Ibupoto. 2024. *RSC advances*, 2024, **14**, 38009-38021.
- [8]. A.J. Laghari, U. Aftab, A. Tahira, A.A. Shah, A. Gradone, M.Y. Solangi, A.H. Samo, M.I. Abro, M. wasim Akhtar, R. Mazzaro, V. Morandi, A. M. Alotaibi, A. Nafady, A. Infantes-Molina, Z. H. Ibupoto, *International Journal of Hydrogen Energy*, (2023), **48**, 12672-12682.
- [9]. A.A. Shah, M. Kumar, U. Aftab and M.I. Abro, *Chemical Engineering & Technology*, 2023, **46**, 459-465.

[10]. B. Naresh, T.V.M. Sreekanth, K. Prasad, K. Yoo and J. Kim, *Surfaces and Interfaces*, 2025, **56**, 105437.

**Table (S2).** Calculated Supercapacitor parameters of synthesized samples

| Sample   | Current Density (Ag <sup>-1</sup> ) | Specific Capacitance (Fg <sup>-1</sup> ) | Columbic Efficiency (%) | Capacitance Retention (%) |
|----------|-------------------------------------|------------------------------------------|-------------------------|---------------------------|
| Pure NiO | 1.5                                 | 433.50                                   | -----                   | -----                     |
|          | 2.5                                 | 161.76                                   |                         |                           |
|          | 3.5                                 | 123.53                                   |                         |                           |
|          | 4.5                                 | 88.62                                    |                         |                           |
|          | 5                                   | 70.33                                    |                         |                           |
| Sample-1 | 1.5                                 | 414.71                                   | -----                   | -----                     |
|          | 2.5                                 | 140.66                                   |                         |                           |
|          | 3.5                                 | 97.57                                    |                         |                           |
|          | 4.5                                 | 82.86                                    |                         |                           |
|          | 5                                   | 66.50                                    |                         |                           |
| Sample-2 | 1.5                                 | 636.83                                   | 97.6                    | 101.5                     |
|          | 2.5                                 | 258.95                                   |                         |                           |
|          | 3.5                                 | 196.04                                   |                         |                           |
|          | 4.5                                 | 92.07                                    |                         |                           |
|          | 5                                   | 72.89                                    |                         |                           |
| Sample-3 | 1.5                                 | 1248.72                                  |                         |                           |
|          | 2.5                                 | 1008.31                                  |                         |                           |
|          | 3.5                                 | 758.18                                   |                         |                           |
|          | 4.5                                 | 253.20                                   |                         |                           |
|          | 5                                   | 148.34                                   |                         |                           |

**Table (S3):** Highlight points of ASC device.

| Sample   | Current Density (Ag <sup>-1</sup> ) | Specific Capacitance (Fg <sup>-1</sup> ) | Energy Density (Wh kg <sup>-1</sup> ) | Power Density (W kg <sup>-1</sup> ) | Columbic Efficiency (%)   | Capacitance Retention (%) |
|----------|-------------------------------------|------------------------------------------|---------------------------------------|-------------------------------------|---------------------------|---------------------------|
| Sample-2 | 1.5                                 | 344.12                                   | 7.31                                  | 293.25                              | 84.6<br>(40000<br>Cycles) | 88.9<br>(40000<br>Cycles) |
|          | 2.5                                 | 275.58                                   | 5.85                                  | 488.75                              |                           |                           |
|          | 3.5                                 | 78.77                                    | 1.67                                  | 684.25                              |                           |                           |
|          | 4.5                                 | 47.19                                    | 1.00                                  | 879.75                              |                           |                           |
|          | 5                                   | 20.46                                    | 0.43                                  | 977.50                              |                           |                           |

**Table (S4).** Comparison of the specific capacitance of NiO/MgO-SiO<sub>2</sub> composite (sample 3) with the reported data.

| Active material                                                    | Specific capacitance      | Current density        | Electrolyte                       | Ref.                |
|--------------------------------------------------------------------|---------------------------|------------------------|-----------------------------------|---------------------|
| MnO <sub>2</sub> /MnCo <sub>2</sub> O <sub>4</sub>                 | 497 F g <sup>-1</sup>     | 0.5 A g <sup>-1</sup>  | 2 M KOH                           | 1                   |
| CoMoO <sub>4</sub> /NiMoO <sub>4</sub>                             | 751 F g <sup>-1</sup>     | 1.0 A g <sup>-1</sup>  | 3 M KOH                           | 2                   |
| Co <sub>3</sub> O <sub>4</sub> /NiO/MnO <sub>2</sub>               | 549 F g <sup>-1</sup>     | 0.5 A g <sup>-1</sup>  | 6 M KOH                           | 3                   |
| CoMn <sub>2</sub> O <sub>4</sub>                                   | 472.6 F g <sup>-1</sup>   | 1.0 A g <sup>-1</sup>  | 2 M KOH                           | 4                   |
| Co <sub>3</sub> O <sub>4</sub> @MnO <sub>2</sub>                   | 1209.4 F g <sup>-1</sup>  | 1.0 A g <sup>-1</sup>  | 2 M KCl                           | 5                   |
| CoMoO <sub>4</sub> @C@MnO <sub>2</sub>                             | 1824 F g <sup>-1</sup>    | 3.0 A g <sup>-1</sup>  | 3 M KOH                           | 6                   |
| CuCo <sub>2</sub> O <sub>4</sub> @NiMoO <sub>4</sub>               | 2207 F g <sup>-1</sup>    | 1.25 A g <sup>-1</sup> | 6 M KOH                           | 7                   |
| CdMn <sub>2</sub> O <sub>4</sub> @CdMn <sub>2</sub> O <sub>4</sub> | 3885 F g <sup>-1</sup>    | 1.5 A g <sup>-1</sup>  | 2 M KOH                           | 8                   |
| Co(OH) <sub>2</sub> @FeCo <sub>2</sub> O <sub>4</sub>              | 1173.43 F g <sup>-1</sup> | 1.0 A g <sup>-1</sup>  | 6 M KOH                           | 9                   |
| Chitosan-modified MgO                                              | 56.32 Fg <sup>-1</sup>    | 0.5 Ag <sup>-1</sup>   | 3 M KOH                           | 10                  |
| NiCo@Si <sub>1</sub> -C                                            | 518.1 F g <sup>-1</sup>   | 0.5 A g <sup>-1</sup>  | 3 M KOH                           | 11                  |
| RH-SiO <sub>2</sub>                                                | 102 F/g                   | 0.5 A/g                | 2 M KOH                           | 12                  |
| SiO <sub>2</sub> -NiFe <sub>2</sub> O <sub>4</sub>                 | 800.8 F g <sup>-1</sup>   | 1 A g <sup>-1</sup>    | 3 M KOH                           | 13                  |
| rGO/n-SiO <sub>2</sub>                                             | 166.9 F g                 | 0.1 A g <sup>-1</sup>  | 1M H <sub>2</sub> SO <sub>4</sub> | 14                  |
| <b>Sample-3</b>                                                    | 1248.72 F g <sup>-1</sup> | 1.5A g <sup>-1</sup>   | <b>3 M KOH</b>                    | <b>Present work</b> |

[1] Y. Zhang, H. Xuan, Y. Xu, B. Guo, H. Li, L. Kang, P. Han, D. Wang and Y. Du, *Electrochim. Acta*, 2016, **206**, 278-290.

[2] Q. Yang and S.Y. Lin, *RSC Adv.* 2016, **6**, 10520–10526.

[3] L. Su, Y. Wang, Y. Sha and M. Hao, *J. Alloys Compd.* 2016, **656**, 585–589.

[4] J. Bhagwan, B.N.V. Krishna and J.S. Yu, *Int. J. Energy Res.* 2021, **45**, 19413–19422.

[5] K. Wang, Z. Shi, Y. Wang, Z. Ye, H. Xia, G. Liu and G. Qiao, *J. Alloys Compd.* 2015, **624**, 85–93.

[6] X. Cui, X. Chen, W. Zhang, X. Yan, M. Wang, J. Lian, Z. Zheng and H. Deng, *J. Alloys Compd.* 2017, **695**, 2109–2116.

[7] J. Lin, H. Liang, H. Jia, S. Chen, Y. Cai, J. Qi, J. Cao and W. Fei, *J. Feng, Inorg. Chem. Front.* 2017, **4**, 1575–1581.

- [8] H.J. Kim, C.W. Kim, S.Y. Kim, A.E. Reddy and C.V.V.M. Gopi, *Mater. Lett.* 2018, **210**, 143–147.
- [9] Z. Wang, P. Hong, S. Peng, T. Zou, Y. Yang, X. Xing, Z. Wang, R. Zhao, Z. Yan and Y. Wang, *Electrochim. Acta.* 2019, **299**, 312–319.
- [10]. S. Sharmila, A. Saranya, S. Rama, M. Lipna, M. Shandhiya, S. Sanjana and A. Murugan, *Ionics*, 2025, 1-20.
- [11]. J. Jia, Z. Qin, X. Yang, X. Peng, G. Ren and Z. Lin, *Diamond and Related Materials*, 2023, **134**, p109786.
- [12]. S.R. Priyan, G.S. Kumar, K. Lalithambigai, M. Shkir, A. Khan, R. Rajendran and G. Arumugam, *Journal of Alloys and Compounds*, 2024, **976**, 173206.
- [13]. I.F.F. Christopher, A. Karuppiah, V.G. Thanapalan, A.V. Selestin and T. Suyambu, *Silicon*, 2024, **16**, 157-176.
- [14]. D.D. Ristiana, M. Handayani, M.A. Anggoro, B.W. Widagdo, E. Angelina, H. Sutanto, I. Anshori, E. Febriana, F. Firdiyono, E. Sulistiyono and A.B. Prasetyo, *South African Journal of Chemical Engineering*, 2024, **48**, 130-137.
